# Supplementary material for: The Increase of Soft Cheese Shelf-Life Packaged with Edible Films Based on Novel Hybrid Nanostructures
Source: MDPI journal article supplement (doi:10.3390/gels8090539), 2022-08-26
Supplement: s1 [file s1]

**Table S1.** LC-MS/MS analysis of thyme oil as received used for the modification of NZ based hybrids

| Peak | Label                                                                                        | Area Sum %   |
|------|----------------------------------------------------------------------------------------------|--------------|
| 1    | Cpd 1: .ALPHA.-PINENE, (-)-; C10 H16; 6.658                                                  | 0.81         |
| 2    | Cpd 2: Camphene; C10 H16; 7.148                                                              | 0.25         |
| 3    | Cpd 3: Sabinene; C10 H16; 8.171                                                              | 0.11         |
| 4    | Cpd 4: .beta.-Myrcene; C10 H16; 8.864                                                        | 0.56         |
| 5    | Cpd 5: Cyclohexene, 1-methyl-4-(1-methylethenyl)-, (R)-; C10 H16; 9.298                      | 0.09         |
| 6    | Cpd 6: .ALPHA. TERPINENE; C10 H16; 9.802                                                     | 0.72         |
| 7    | Cpd 7: Cyclohexane, 1-methyl-3-(1-methylethenyl)-, cis-; C10 H18; 9.998                      | 0.12         |
| 8    | <b>Cpd 8: Benzene, 1-methyl-4-(1-methylethyl)-; C10 H14; 10.145    η p-cymene</b>            | <b>12.28</b> |
| 9    | <b>Cpd 9: D-Limonene; C10 H16; 10.341</b>                                                    | <b>16.54</b> |
| 10   | Cpd 10: .gamma.-Terpinene; C10 H16; 11.616                                                   | 0.34         |
| 11   | Cpd 11: .alpha.-terpinolene; C10 H16; 12.890                                                 | 0.23         |
| 12   | Cpd 12: Linalool; C10 H18 O; 13.497                                                          | 1.67         |
| 13   | Cpd 13: Camphor; C10 H16 O; 15.292                                                           | 0.11         |
| 14   | Cpd 14: Cyclohexanol, 1-methyl-4-(1-methylethenyl)-; C10 H18 O; 15.390                       | 0.08         |
| 15   | Cpd 15: Bicyclo[2.2.1]heptan-2-ol, 1,7,7-trimethyl-, exo-; C10 H18 O; 15.845                 | 0.1          |
| 16   | Cpd 16: endo-Borneol; C10 H18 O; 16.265                                                      | 0.41         |
| 17   | Cpd 17: .ALPHA.-TERPINEOL; C10 H18 O; 17.462                                                 | 4.21         |
| 18   | Cpd 18: Cyclohexanol, 1-methyl-4-(1-methylethylidene)-; C10 H18 O; 17.778                    | 0.52         |
| 19   | Cpd 19: Fenchyl acetate; C12 H20 O2; 18.821                                                  | 0.26         |
| 20   | Cpd 20: Cyclohexanol, 2-methylene-3-(1-methylethyl)-, acetate, cis-; C12 H20 O2; 20.228      | 0.12         |
| 21   | Cpd 21: Bicyclo[2.2.1]heptan-2-ol, 1,7,7-trimethyl-, acetate, (1S-endo)-; C12 H20 O2; 21.831 | 2.89         |
| 22   | <b>Cpd 22: Phenol, 5-methyl-2-(1-methylethyl)-; C10 H14 O; 22.273    THYMOL</b>              | <b>32.54</b> |
| 23   | <b>Cpd 23: Phenol, 5-methyl-2-(1-methylethyl)-; C10 H14 O; 22.651</b>                        | <b>24.16</b> |
| 24   | Cpd 24: Tetradecane; C14 H30; 26.754                                                         | 0.11         |
| 25   | Cpd 25: TRANS(.BETA.)-CARYOPHYLLENE; C15 H24; 27.251                                         | 0.36         |
| 26   | Cpd 26: Hexadecane; C16 H34; 34.638                                                          | 0.17         |
| 27   | Cpd 27: Octadecane; C18 H38; 41.781                                                          | 0.07         |
| 28   | Cpd 28: Hexadecanoic acid, 2-hydroxy-1-(hydroxymethyl)ethyl ester; C19 H38 O4; 60.105        | 0.19         |

**Table S2.** LC-MS/MS analysis of remaining thyme oil after the first stage distillation process for the modification of NZ based hybrids

| Peak | Label                                                                                        | Area Sum %   |
|------|----------------------------------------------------------------------------------------------|--------------|
| 1    | Cpd 1: Camphene; C10 H16; 7.142                                                              | 0.18         |
| 2    | Cpd 2: Benzene, 1-methyl-4-(1-methylethyl)-; C10 H14; 10.131                                 | 0.99         |
| 3    | Cpd 3: D-Limonene; C10 H16; 10.292                                                           | 0.97         |
| 4    | Cpd 4: Linalool; C10 H18 O; 13.492                                                           | 0.69         |
| 5    | Cpd 5: 3-Cyclohexen-1-ol, 1-methyl-4-(1-methylethyl)-; C10 H18 O; 14.942                     | 0.21         |
| 6    | Cpd 6: Camphor; C10 H16 O; 15.278                                                            | 0.15         |
| 7    | Cpd 7: Cyclohexanol, 1-methyl-4-(1-methylethenyl)-; C10 H18 O; 15.383                        | 0.17         |
| 8    | Cpd 8: 15.838                                                                                | 0.19         |
| 9    | Cpd 9: Bicyclo[2.2.1]heptan-2-ol, 1,7,7-trimethyl-, exo-; C10 H18 O; 16.258                  | 0.54         |
| 10   | Cpd 10: 3-Cyclohexen-1-ol, 4-methyl-1-(1-methylethyl)-; C10 H18 O; 16.825                    | 0.11         |
| 11   | Cpd 11: .ALPHA.-TERPINEOL; C10 H18 O; 17.463                                                 | 1.65         |
| 12   | Cpd 12: Cyclohexanol, 1-methyl-4-(1-methylethylidene)-; C10 H18 O; 17.778                    | 0.54         |
| 13   | Cpd 13: 18.611                                                                               | 0.09         |
| 14   | Cpd 14: Fenchyl acetate; C12 H20 O2; 18.821                                                  | 0.54         |
| 15   | Cpd 15: Ascaridole; C10 H16 O2; 20.249                                                       | 0.19         |
| 16   | Cpd 16: Isobornyl acetate; C12 H20 O2; 21.748                                                | 0.36         |
| 17   | Cpd 17: Bicyclo[2.2.1]heptan-2-ol, 1,7,7-trimethyl-, acetate, (1S-endo)-; C12 H20 O2; 21.867 | 3.38         |
| 18   | <b>Cpd 18: Phenol, 5-methyl-2-(1-methylethyl)-; C10 H14 O; 22.294</b>                        | <b>46.61</b> |
| 19   | <b>Cpd 19: Phenol, 5-methyl-2-(1-methylethyl)-; C10 H14 O; 22.679</b>                        | <b>40.09</b> |
| 20   | Cpd 20: 25.592                                                                               | 0.18         |
| 21   | Cpd 21: Tetradecane; C14 H30; 26.747                                                         | 0.15         |
| 22   | Cpd 22: TRANS(.BETA.)-CARYOPHYLLENE; C15 H24; 27.251                                         | 0.33         |
| 23   | Cpd 23: 29.282                                                                               | 0.18         |
| 24   | Cpd 24: CARYOPHYLLENE OXIDE; C15 H24 O; 33.672                                               | 0.1          |
| 25   | Cpd 25: Hexadecane; C16 H34; 34.639                                                          | 0.21         |
| 26   | Cpd 26: 48.132                                                                               | 0.37         |
| 27   | Cpd 27: 48.426                                                                               | 0.39         |
| 28   | Cpd 28: 60.105                                                                               | 0.43         |
